# Supplementary material for: Association between health risks and frailty in relation to the degree of housing damage among elderly survivors of the great East Japan earthquake
Source: Springer Nature journal article supplement (doi:10.1186/s12877-018-0828-x), 2018-06-04
Supplement: MOESM1 [file 15843110]

Table S1. the Kihon Checklist in Japan.

| Domain          | Question                                                                      | Yes | No |
|-----------------|-------------------------------------------------------------------------------|-----|----|
| Lifestyle       | Do you normally travel by bus or train by yourself?                           | 0   | 1  |
|                 | Do you go out and by daily necessities by yourself?                           | 0   | 1  |
|                 | Do you manage your own deposits and savings at the bank?                      | 0   | 1  |
|                 | Do you often go out to visit your friends?                                    | 0   | 1  |
|                 | Do you consult with your family or friends about their problems?              | 0   | 1  |
| Motor abilities | Are you able to go upstairs without holding rail or wall?                     | 0   | 1  |
|                 | Are you able to stand up from the chair without any aids?                     | 0   | 1  |
|                 | Are you able to keep walking for about 15 minutes?                            | 0   | 1  |
|                 | Have you fallen during the past year?                                         | 1   | 0  |
|                 | Do you worry about falling down?                                              | 1   | 0  |
| Nutrition       | Have you lost more than 2~3 kg in the past 6 months?                          | 1   | 0  |
|                 | Body mass index less than 18.5 kg/m <sup>2</sup>                              | 1   | 0  |
| Oral function   | Compared with six months ago, do you have difficulty in eating hard food?     | 1   | 0  |
|                 | Do you choke when you drink tea or soup?                                      | 1   | 0  |
|                 | Do you often feel your mouth dry?                                             | 1   | 0  |
| Seclusion       | Do you go out more than once in a week?                                       | 0   | 1  |
|                 | Compared with last year, do you go out less often?                            | 1   | 0  |
| Forgetfulness   | Do people around you say you repeat the same thing and have become forgetful? | 1   | 0  |
|                 | Do you make phone calls by yourself?                                          | 0   | 1  |
|                 | Do you find yourself not knowing today's date?                                | 1   | 0  |
