# Supplementary material for: Association between health risks and frailty in relation to the degree of housing damage among elderly survivors of the great East Japan earthquake
Source: Springer Nature journal article supplement (doi:10.1186/s12877-018-0828-x), 2018-06-04
Supplement: MOESM2 [file 15843110]

**Table S2-1. Factors associated with frailty (1 point increase) among male elderly survivors in the RIAS study, 2011-2015.**

| Variable                      | <i>All participants in the present study.</i>        |       | <i>By the degree of housing damage</i> |       |         |       |           |       | <i>By residential status<sup>b</sup></i> |       |           |       |                 |       |
|-------------------------------|------------------------------------------------------|-------|----------------------------------------|-------|---------|-------|-----------|-------|------------------------------------------|-------|-----------|-------|-----------------|-------|
|                               |                                                      |       | No                                     |       | Partial |       | Extensive |       | No displaced                             |       | Temporary |       | Other residence |       |
| Number                        | 1025                                                 |       | 448                                    |       | 172     |       | 405       |       | 603                                      |       | 176       |       | 246             |       |
|                               | <i>Adjusted coefficient (SE)<sup>a</sup> P-value</i> |       |                                        |       |         |       |           |       |                                          |       |           |       |                 |       |
| BMI, underweight              | 1.131                                                | 0.039 | 1.248                                  | 0.160 | 0.854   | 0.406 | 0.927     | 0.141 | 1.076                                    | 0.136 | 3.205     | <.001 | 0.833           | 0.255 |
|                               | (0.548)                                              |       | (0.887)                                |       | (1.027) |       | (0.629)   |       | (0.721)                                  |       | (0.221)   |       | (0.732)         |       |
| Current drinkers              | -0.118                                               | 0.081 | -0.212                                 | 0.037 | -0.007  | 0.965 | -0.094    | 0.380 | -0.129                                   | 0.138 | -0.168    | 0.320 | -0.106          | 0.425 |
|                               | (0.067)                                              |       | (0.101)                                |       | (0.161) |       | (0.107)   |       | (0.087)                                  |       | (0.169)   |       | (0.133)         |       |
| Physical inactivity           | 0.275                                                | <.001 | 0.274                                  | 0.002 | 0.326   | 0.016 | 0.273     | 0.003 | 0.265                                    | <.001 | 0.213     | 0.145 | 0.344           | 0.002 |
|                               | (0.058)                                              |       | (0.089)                                |       | (0.134) |       | (0.092)   |       | (0.074)                                  |       | (0.146)   |       | (0.112)         |       |
| Sedentary lifestyle           | 0.259                                                | <.001 | 0.270                                  | 0.008 | 0.174   | 0.272 | 0.253     | 0.016 | 0.297                                    | 0.001 | 0.225     | 0.158 | 0.164           | 0.198 |
|                               | (0.067)                                              |       | (0.102)                                |       | (0.159) |       | (0.105)   |       | (0.088)                                  |       | (0.160)   |       | (0.127)         |       |
| Poor dietary diversity        | 0.114                                                | 0.023 | 0.098                                  | 0.210 | 0.108   | 0.362 | 0.121     | 0.131 | 0.086                                    | 0.175 | -0.074    | 0.604 | 0.282           | 0.004 |
|                               | (0.050)                                              |       | (0.078)                                |       | (0.119) |       | (0.080)   |       | (0.064)                                  |       | (0.142)   |       | (0.098)         |       |
| Poor self-rated health        | 0.857                                                | <.001 | 0.877                                  | <.001 | 0.773   | 0.002 | 0.851     | <.001 | 0.862                                    | <.001 | 1.043     | 0.001 | 0.709           | 0.002 |
|                               | (0.116)                                              |       | (0.170)                                |       | (0.244) |       | (0.189)   |       | (0.147)                                  |       | (0.297)   |       | (0.224)         |       |
| Standard of living, difficult | 0.192                                                | 0.002 | 0.253                                  | 0.011 | 0.239   | 0.044 | 0.121     | 0.224 | 0.244                                    | 0.002 | 0.005     | 0.975 | 0.224           | 0.062 |
|                               | (0.060)                                              |       | (0.099)                                |       | (0.119) |       | (0.099)   |       | (0.078)                                  |       | (0.167)   |       | (0.120)         |       |
| Psychological distress        | 0.630                                                | 0.002 | 0.099                                  | 0.756 | 0.041   | 0.881 | 1.193     | <.001 | 0.079                                    | 0.710 | 1.475     | 0.001 | 0.959           | 0.048 |
|                               | (0.207)                                              |       | (0.319)                                |       | (0.273) |       | (0.333)   |       | (0.213)                                  |       | (0.439)   |       | (0.484)         |       |
| Poor social networks          | 0.360                                                | <.001 | 0.307                                  | 0.002 | 0.267   | 0.051 | 0.442     | <.001 | 0.298                                    | <.001 | 0.306     | 0.080 | 0.532           | <.001 |
|                               | (0.065)                                              |       | (0.100)                                |       | (0.136) |       | (0.111)   |       | (0.081)                                  |       | (0.174)   |       | (0.133)         |       |

BMI: Body Mass Index; SE: Standard Error

Nonsignificant variables are not displayed in table.

<sup>a</sup> Adjusted for age, body mass index (underweight: <18, overweight: ≥ 25 vs. normal: 18-25 kg/m<sup>2</sup>), diabetes mellitus (yes vs no), current drinkers (yes vs no), physical activity (inactivity: <23METs·hour/week vs. ≥ 23METs·hour/week), sedentary lifestyle (yes vs. no), poor dietary diversity (yes vs. no), poor self-rated health (yes vs. no), standard of living (difficult vs. acceptable), psychological distress (yes vs. no), and poor social networks (yes vs. no).

<sup>b</sup> To avoid misclassification of participants' current situation, we continued updating each person's residential status throughout follow-up using data from repeated questionnaires.
