# Supplementary material for: Association between health risks and frailty in relation to the degree of housing damage among elderly survivors of the great East Japan earthquake
Source: Springer Nature journal article supplement (doi:10.1186/s12877-018-0828-x), 2018-06-04
Supplement: MOESM3 [file 15843110]

**Table S2-2. Factors associated with frailty (1 point increase) among female elderly survivors in the RIAS study, 2011-2015.**

| Variable                      | <i>All participants in the present study.</i>        |       | <i>By the degree of housing damage</i> |       |         |       |           |       | <i>By residential status<sup>b</sup></i> |       |           |       |                 |       |
|-------------------------------|------------------------------------------------------|-------|----------------------------------------|-------|---------|-------|-----------|-------|------------------------------------------|-------|-----------|-------|-----------------|-------|
|                               |                                                      |       | No                                     |       | Partial |       | Extensive |       | No displaced                             |       | Temporary |       | Other residence |       |
| Number                        | 1236                                                 |       | 555                                    |       | 175     |       | 506       |       | 694                                      |       | 262       |       | 280             |       |
|                               | <i>Adjusted coefficient (SE)<sup>a</sup> P-value</i> |       |                                        |       |         |       |           |       |                                          |       |           |       |                 |       |
| BMI, underweight              | 0.521                                                | 0.001 | 0.817                                  | <.001 | 0.434   | 0.343 | 0.255     | 0.250 | 0.739                                    | 0.001 | 0.746     | 0.024 | -0.007          | 0.976 |
|                               | (0.154)                                              |       | (0.212)                                |       | (0.458) |       | (0.221)   |       | (0.211)                                  |       | (0.330)   |       | (0.247)         |       |
| BMI, overweight               | 0.178                                                | 0.009 | 0.249                                  | 0.013 | -0.048  | 0.772 | 0.181     | 0.098 | 0.202                                    | 0.024 | 0.240     | 0.137 | 0.046           | 0.731 |
|                               | (0.068)                                              |       | (0.100)                                |       | (0.165) |       | (0.110)   |       | (0.089)                                  |       | (0.161)   |       | (0.133)         |       |
| Diabetes mellitus             | 0.146                                                | 0.211 | 0.095                                  | 0.593 | 0.144   | 0.555 | 0.186     | 0.330 | 0.132                                    | 0.373 | 0.181     | 0.474 | 0.097           | 0.730 |
|                               | (0.117)                                              |       | (0.178)                                |       | (0.243) |       | (0.191)   |       | (0.148)                                  |       | (0.252)   |       | (0.280)         |       |
| Sedentary lifestyle           | 0.378                                                | <.001 | 0.437                                  | <.001 | 0.470   | 0.010 | 0.325     | <.001 | 0.402                                    | <.001 | 0.580     | <.001 | 0.186           | 0.072 |
|                               | (0.062)                                              |       | (0.100)                                |       | (0.182) |       | (0.088)   |       | (0.092)                                  |       | (0.134)   |       | (0.103)         |       |
| Poor dietary diversity        | 0.112                                                | 0.026 | 0.112                                  | 0.122 | 0.113   | 0.381 | 0.108     | 0.201 | 0.111                                    | 0.083 | 0.038     | 0.745 | 0.174           | 0.132 |
|                               | (0.050)                                              |       | (0.072)                                |       | (0.128) |       | (0.084)   |       | (0.064)                                  |       | (0.115)   |       | (0.115)         |       |
| Poor self-rated health        | 0.704                                                | <.001 | 0.668                                  | <.001 | 0.511   | 0.002 | 0.835     | <.001 | 0.576                                    | <.001 | 0.956     | <.001 | 0.761           | <.001 |
|                               | (0.089)                                              |       | (0.151)                                |       | (0.166) |       | (0.136)   |       | (0.116)                                  |       | (0.220)   |       | (0.172)         |       |
| Standard of living, difficult | 0.231                                                | <.001 | 0.303                                  | 0.001 | 0.408   | 0.005 | 0.137     | 0.084 | 0.307                                    | <.001 | 0.223     | 0.050 | 0.127           | 0.193 |
|                               | (0.055)                                              |       | (0.092)                                |       | (0.144) |       | (0.079)   |       | (0.082)                                  |       | (0.114)   |       | (0.098)         |       |
| Psychological distress        | 0.537                                                | <.001 | 0.756                                  | <.001 | 0.489   | 0.095 | 0.424     | 0.003 | 0.685                                    | <.001 | 0.261     | 0.147 | 0.641           | 0.001 |
|                               | (0.112)                                              |       | (0.209)                                |       | (0.292) |       | (0.143)   |       | (0.192)                                  |       | (0.180)   |       | (0.188)         |       |
| Poor social networks          | 0.212                                                | <.001 | 0.174                                  | 0.026 | 0.406   | 0.004 | 0.203     | 0.016 | 0.286                                    | <.001 | 0.141     | 0.216 | 0.136           | 0.246 |
|                               | (0.053)                                              |       | (0.078)                                |       | (0.139) |       | (0.084)   |       | (0.069)                                  |       | (0.114)   |       | (0.117)         |       |

BMI: Body Mass Index; SE: Standard Error

Nonsignificant variables are not displayed in table.

<sup>a</sup> Adjusted for age, BMI (underweight: <18, overweight: ≥ 25 vs. normal: 18-25 kg/m<sup>2</sup>), diabetes mellitus (yes vs no), sedentary lifestyle (yes vs. no), poor dietary diversity (yes vs. no), poor self-rated health (yes vs. no), standard of living (difficult vs. acceptable), psychological distress (yes vs. no), and poor social networks (yes vs. no).

<sup>b</sup> To avoid misclassification of participants' current situation, we continued updating each person's residential status throughout follow-up using data from repeated questionnaires.
